# Supplementary material for: Spirulina-PCL Nanofiber Wound Dressing to Improve Cutaneous Wound Healing by Enhancing Antioxidative Mechanism
Source: Hindawi journal article supplement (doi:10.1155/2016/6135727), 2016-01-01
Supplement: f1 [file 6135727.f1.pdf]

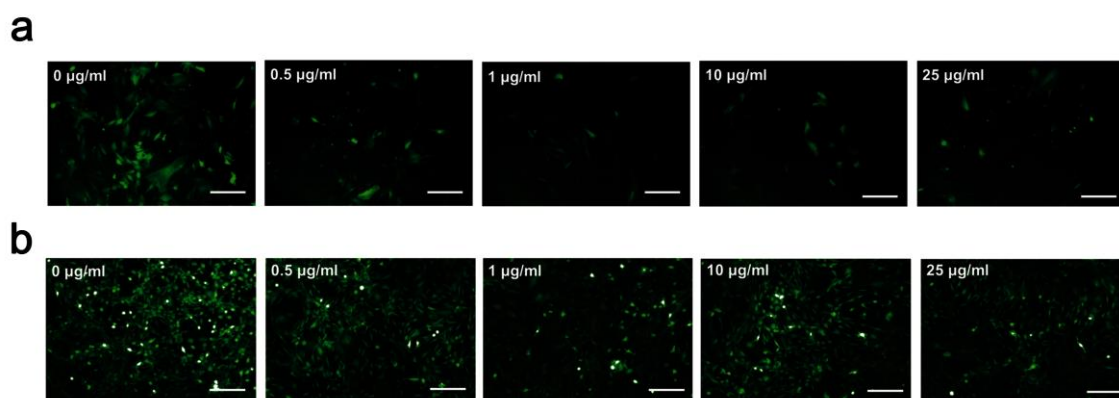

Supplementary material 1. Cellular ROS synthesis images by serial treatment (0, 0.5, 1.0, 10, 25  $\mu\text{g/ml}$ ) of a) *Spirulina* extract and b) the extract with 200 mM of hydrogen peroxide. ROS synthesis was reduced by *Spirulina* extract, especially at 25  $\mu\text{g/ml}$ . Hydrogen peroxide increased ROS synthesis however the *Spirulina* extract also reduce at hydrogen treatment, especially at 25  $\mu\text{g/ml}$ .

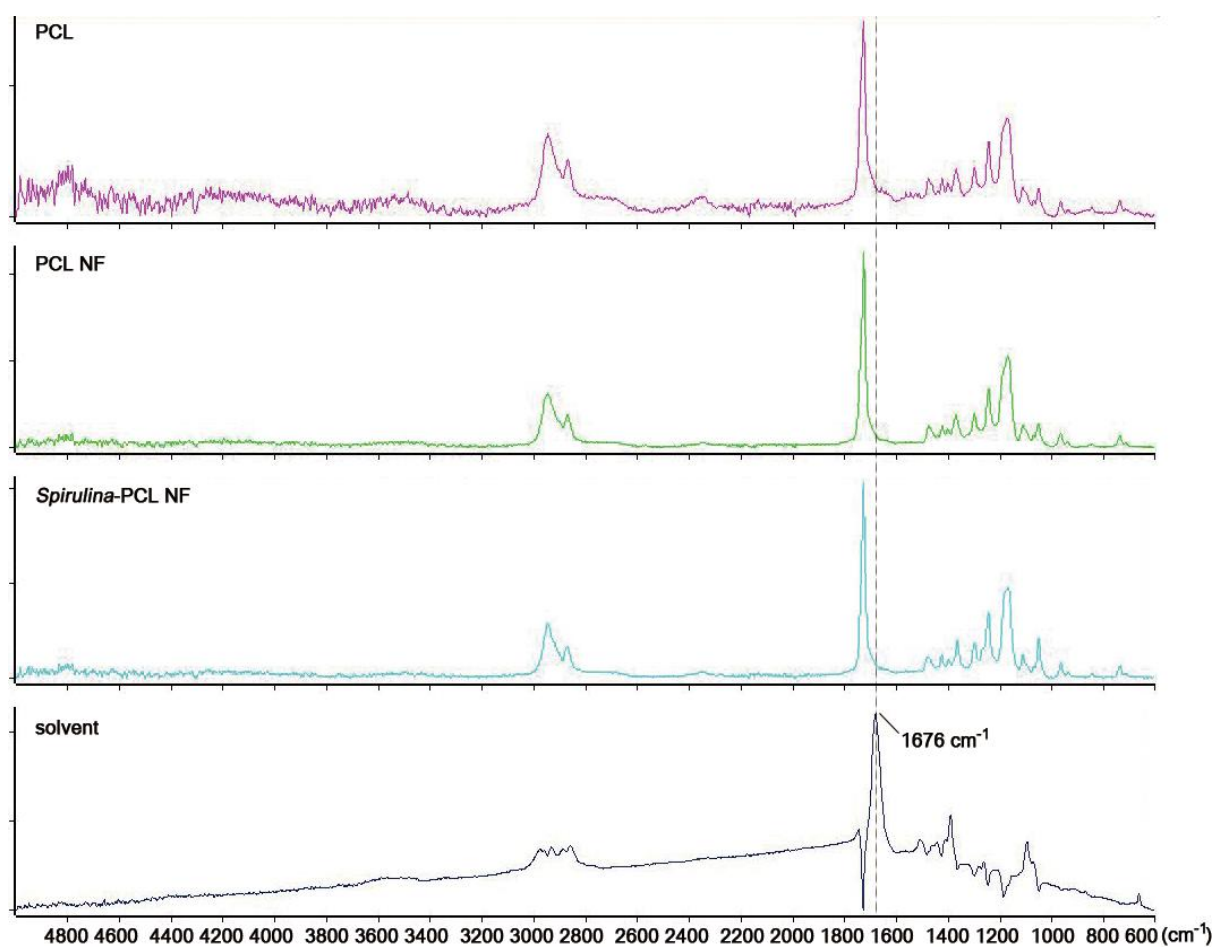

Supplementary material 2. FT-IR spectrum of component and samples of nanofiber. PCL, PCL

nanofiber, Spirulina-PCL nanofiber and solvent (THF:DMF=7:3) were observed using FT-IR. A specific peak of solvent such as  $1676\text{ cm}^{-1}$  weren't observed at the FT-IR spectrum of the nanofiber. For the FTIR data, the peak of  $1676\text{ cm}^{-1}$  weren't shown at the spectra of PCL nanofiber and Spirulina-PCL nanofiber. It implied that any solvent remained at nanofiber.
